# Supplementary material
Source: PubMed Central journal article supplement (PMC2711365)
Supplement: mmc1.pdf [file mmc1.pdf]

Biophysical Journal, Volume 97

**Supporting Material**

**Measuring ion channels on solid supported membranes**

Patrick Schulz, Benjamin Dueck, Alexandre Mourot, Lina Hatahet, and Klaus Fendler

## Supplemental Material

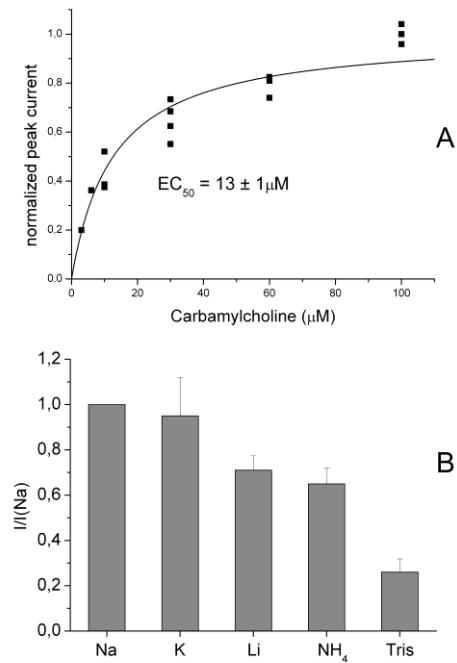

**Fig. S1:** Kinetic properties of the nAChR on the SSM. A) CCh dose-response relationship of the normalized peak currents. Four independent measurements are combined, each was fitted using a hyperbolic function and the data were normalized to the saturation value given by the fit. Finally the 4 datasets were fitted together using a hyperbolic function (solid line) yielding an  $\text{EC}_{50}$  of  $13 \pm 1 \mu\text{M}$ . B) Ion specificity of the peak currents at a cation concentration of 100 mM. For each ion the peak currents of three separate experiments were normalized to the  $\text{Na}^+$  current and mean values and errors (SEM) are given.

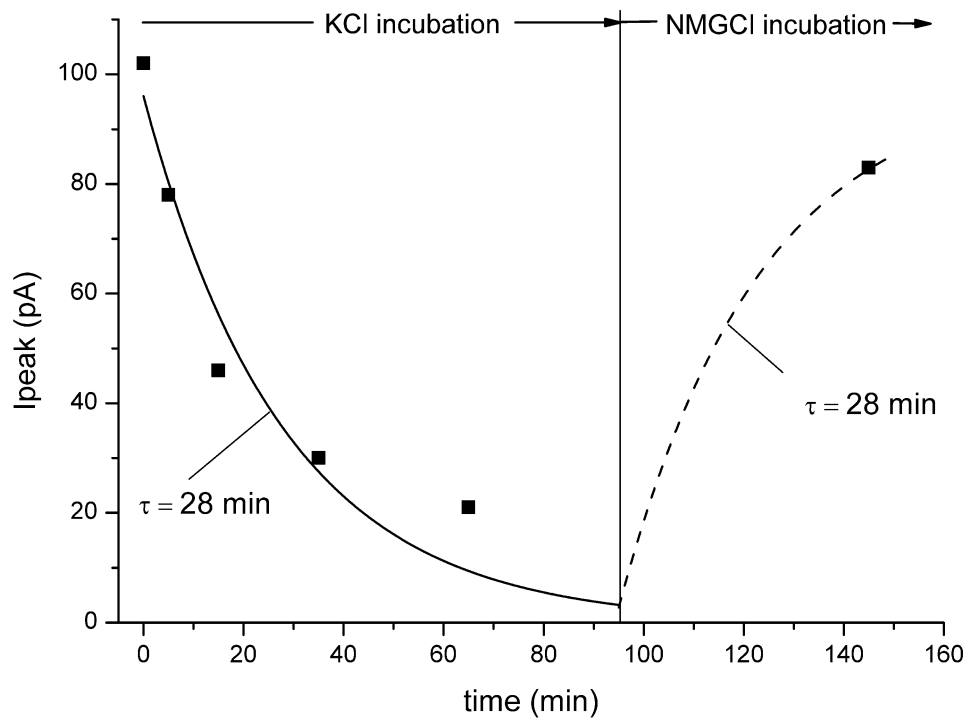

**Fig. S2:** Stability of the cation gradient across the membrane of the nAChR containing vesicles. Conditions as in Fig. 3 with  $K^+$  instead of  $Na^+$ . At  $t = 0$  the NMG phase ( $t = 3 - 4$  s in Fig. 3) was omitted leading to a gradual decline of the cation gradient and a concomitant decrease of the signal. The solid line is an exponential fit yielding a time constant of 28 min. At  $t = 96$  min the NMG phase was re-established leading to restoration of the signal. For comparison an exponential increase with a time constant of 28 min is included in the figure (dashed line).
